# Supplementary material for: Blockchain-Based ICOs: Pure Hype or the Dawn of a New Era of Startup Financing?
Source: Preprints.org preprint supplement (doi:10.20944/preprints201810.0550.v1), 2018-10-24
Supplement: Supplementary file 2 [file supplementary]

## Sheet: Datensatz ICO bereinigt
project_name	symbol	1btc_icoreturn	usd_marketcap	usd_ico_return	1eth_ico_return	Dummy2015	Dummy2016	Dummy2017	year	ico_duration_days	days_since_icoend	token_share_ico	token_share_team	funds_raised_usd_log	funds_raised_usd	dummy_btc_used	dummy_eth_used	dummy_blocknet	dummy_cloudcom	dummy_financial	dummy_gambling	dummy_gaming	dummy_media	dumy_own	dummy_eth	dummy_waves	dummy_omni	dummy_xcp	dummy_nxt	dummy_bts	value_infrastructure	value_financial	value_utility	no_team_website	team_perc_x_linkedin	dummy_eastern	dummy_china	team_diff_countries	share_devs	share_business	dummy_real_names	dummy_pics_availabe	no_linkedin_profiles_project	no_advisors	advisor_linkedin_available	dummy_western	dummy_orthodox	dummy_sinic	dummy_landingpage
Tezos	XTZ					0	0	1	2017	13	20	0.78	0.1	8.35759	227817556	1	1	1	0	0	0	0	0	1	0	0	0	0	0	0	2	2	2	11	222.55	0	0	2	0.8182	0.2222	1	1	0	3	2	1	0	0	0
EOS	EOS	1.7036	462115854	1.85	2.43	0	0	1	2017	5	38	0.2	0.1	8.26782	185276640	0	1	0	0	0	0	0	0	0	0	0	0	0	0	0	2	1	2	21	161.57	0	1	4	0.2222	0.8889	1	1	0	0	0	0	0	1	1
Bancor Protocol	BNT	0.5292	83296528	0.52	0.91	0	0	1	2017	0	52	0.5	0.1	8.18681	153748836	0	1	0	0	0	0	0	0	0	1	0	0	0	0	0	2	2	2	12	170.92	0	0	2	0.5833	0.4167	1	1	14	9	9	0	0	0	0
Status	SNT	1.6428	189066751	1.64	2.41	0	0	1	2017	1	43	0.4407	0.2	7.98801	97277862	0	1	0	0	0	0	0	0	0	1	0	0	0	0	0	2	1	2	8	58.13	0	0	1	0.75	0.25	0	1	10	0	0	1	0	0	0
Tenx (Presale+Sale)	PAY	1.3465	100899469	1.36	2.2	0	0	1	2017	1	50	0.51	0.2	7.85415	71475000	0	1	0	0	1	0	0	0	0	1	0	0	0	0	0	1	1	1	10	431.6	0	0	3	0.5	0.5	1	1	0	3	3	0	0	1	0
MobileGo	MGO	0.1435	84876143	0.16	0.14	0	0	1	2017	36	64	0.7	0.3	7.72484	53069235	1	1	0	0	0	0	1	0	0	1	0	0	0	0	0	0	0	1	8	212.13	1	0	3	0.25	0.75	1	1	0	0	0	1	0	0	0
Aeternity (2nd)	AE	0.8882		0.96	1.49	0	0	1	2017	21	45	0.82	0.17	7.58491	38450780	1	1	1	0	0	0	0	0	0	1	0	0	0	0	0	2	1	2	12	298.92	1	0	7	0.5	0.5	1	1	7	4	0	1	0	0	0
Basic Attention Token	BAT	2.8339	127750000	3.07	3.63	0	0	1	2017	0	64	0.6667	0.3333	7.5563	36000000	0	1	0	0	0	0	0	0	0	1	0	0	0	0	0	0	1	0	11	232.36	0	0	2	0.4545	0.1818	1	1	0	5	3	1	0	0	0
SONM Network	SNM	0.3253	12855542	0.35	0.49	0	0	1	2017	23	47	0.75	0.09	7.55557	35939150	1	1	0	1	0	0	0	0	0	1	0	0	0	0	0	1	0	1	10	172.6	1	0	2	0.9	0.1	1	1	18	6	4	0	0	0	0
Civic	CVC	1.6388	56059540	1.66	2.63	0	0	1	2017	0	43	0.3333	0.3333	7.51851	33000000	1	1	0	0	0	0	0	0	0	1	0	0	0	0	0	2	1	2	2	500	0	0	1	0.5	0.5	1	1	20	0	0	1	0	0	0
Polybius	PLBT	0.4673	14931861	0.51	0.67	0	0	1	2017	30	34	0.93	0.05	7.49285	31106692	1	1	0	0	1	0	0	0	0	1	0	0	0	0	0	0	2	1	11	500	0	0	1	0.1818	0.8182	1	1	7	12	12	1	0	0	0
Storj (2nd)	STORJ	0.1568	29174156	0.18	0.13	0	0	1	2017	8	68	1	0	7.47712	30000000	0	1	0	0	0	0	0	0	0	1	0	0	0	0	0	1	1	1	16	297.88	0	0	1	0.75	0.25	1	1	19	2	1	1	0	0	0
Monaco	MCO	1.0081	8801848	1.08	0.55	0	0	1	2017	31	46	0.306	0.3	7.41962	26279395	0	1	0	0	1	0	0	0	0	1	0	0	0	0	0	0	2	2	4	377.5	0	1	3	0.25	0.75	1	1	4	6	6	1	0	0	1
FunFair	FUN	1.6861	49744854	0	2.54	0	0	1	2017	0	42	0.2128	0.375	7.41497	26000000	0	1	0	0	0	1	0	0	0	1	0	0	0	0	0	0	1	1	8	276.88	0	0	1	0.625	0.375	1	1	0	10	8	1	0	0	0
Tierion	TNT					0	0	1	2017	0	7	0.35	0.29	7.39864	25040172	0	1	0	0	0	0	0	0	0	1	0	0	0	0	0	0	1	2	4	240	0	0	1	0.75	0.25	1	1	5	5	5	1	0	0	0
OmiseGo	OMG	8.9329	158864366	9.26	9.48	0	0	1	2017	0	40	0.651	0.099	7.39794	25000000	1	1	0	0	1	0	0	0	0	1	0	0	0	0	0	2	1	1	5	181	0	0	2	0.6	0.4	1	1	62	10	6	0	0	1	1
Aragon	ANT	1.7127	61629860	0.12	0.72	0	0	1	2017	0	78	0.7	0.15	7.3895	24519000	0	1	0	0	0	0	0	0	0	1	0	0	0	0	0	2	0	1	2	375.5	0	0	1	1	0	1	0	6	0	0	1	0	0	0
openANX	OAX					0	0	1	2017	12	30	0.3	0.2	7.27316	18756937	0	1	0	0	0	0	0	0	0	1	0	0	0	0	0	0	1	1	21	301.71	0	1	2	0.381	0.619	1	1	65	5	3	0	0	1	0
Pillar Project	PLR	0.4904	25048744	0.65	0.46	0	0	1	2017	2	17	0.2842	0.1	7.24723	17669549	0	1	0	0	1	0	0	0	0	1	0	0	0	0	0	2	0	1	15	286.2	0	0	5	0.4667	0.5333	1	1	6	14	9	1	0	0	0
Cosmos	ATOM					0	0	1	2017	0	119	0.75	0.2	7.22565	16813341	1	1	0	0	0	0	0	0	1	0	0	0	0	0	0	2	2	2	11	330	1	0	5	0.6364	0.3636	1	1	0	4	3	1	0	0	0
Qtum	QTUM	8.4357	10629400	22.08	4.05	0	0	1	2017	7	133	0.51	0.2	7.17306	14895775	1	1	1	0	0	0	0	0	1	0	0	0	0	0	0	2	2	2	18	60.44	0	1	2	0.7222	0.2778	1	1	5	12	7	0	0	1	0
Nimiq	NET	0.4622	261061	0.5	0.55	0	0	1	2017	10	26	0.05	0.2	7.16006	14456400	0	1	1	0	0	0	0	0	0	1	0	0	0	0	0	1	2	1	13	81.38	0	0	2	0.4615	0.5385	1	1	0	0	0	1	0	0	0
Mysterium Network	MYST	0.8242	18879533	0.99	0.93	0	0	1	2017	0	65	0.575	0.1227	7.15294	14221301	0	1	0	0	0	0	0	0	0	1	0	0	0	0	0	2	1	1	8	233.5	1	0	1	0.5	0.5	1	1	0	0	0	1	0	0	0
Cofound.it	CFI	10.8255	12559875	10.44	11.73	0	0	1	2017	1	58	0.25	0.2	7.14657	14014226	0	1	0	0	0	0	0	1	0	1	0	0	0	0	0	0	1	1	5	451.8	0	1	3	0.2	0.8	1	1	11	7	7	1	0	0	0
Gnosis	GNO	0.2856	215318833	6.35	1.4	0	0	1	2017	0	101	0.0417	0.9583	7.10487	12731117	0	1	0	0	0	0	0	0	0	1	0	0	0	0	0	2	2	2	10	282.6	0	0	6	0.6	0.4	1	1	0	7	6	1	0	0	0
TokenCard	TKN	0.597	14412045	1.13	0.4	0	0	1	2017	0	93	0.6	0.2	7.1038	12700000	0	1	0	0	1	0	0	0	0	1	0	0	0	0	0	1	2	1	0	0	0	0	0	0	0	0	0	0	0	0	1	0	0	1
iEx.ec.	RLC	0.9132	33450662	2.06	0.46	0	0	1	2017	0	106	0.6897	0.17	7.08322	12112000	1	1	0	1	0	0	0	0	0	1	0	0	0	0	0	2	1	1	10	315.4	0	0	2	0.4	0.6	1	1	5	0	0	1	0	0	0
Santiment	SAN	0.7506	12293609	0.79	0.95	0	0	1	2017	1	29	0.45	0.15	7.07767	11958300	0	1	0	0	0	0	0	0	0	1	0	0	0	0	0	1	2	2	9	195.11	1	1	6	0.5556	0.4444	1	0	6	0	0	1	0	0	0
AdEx	ADX	0.8153	5174320	0.89	1.17	0	0	1	2017	0	34	0.8	0.1	7.06887	11718359	0	1	0	0	0	0	0	1	0	1	0	0	0	0	0	1	1	0	7	283	1	0	1	0.7143	0.2857	1	1	2	9	9	1	0	0	0
Veritaseum	VERI	26.515	334585214	30.1	24.2	0	0	1	2017	31	69	0.0201	0.9799	7.04139	11000000	0	1	0	0	1	0	0	0	1	0	0	0	0	0	0	0	1	0	3	290	0	0	2	0.6667	0.3333	1	0	5	0	0	1	0	0	0
Wagerr	WGR	0.5185	13048449	0.55	0.76	0	0	1	2017	23	39	0.425	0.08	7.03783	10910061	1	1	0	0	0	1	0	0	0	0	1	0	0	0	0	1	1	2	5	221.2	0	0	4	0.6	0.4	1	1	7	1	0	1	0	0	0
BOScoin	BOS					0	0	1	2017	7	85	0.4833	0.16	7.02594	10615486	1	0	1	0	0	0	0	0	1	0	0	0	0	0	0	2	1	1	15	0	0	0	1	0.4667	0.5333	1	1	3	1	1	0	0	1	0
BlockchainCapital	BCAP	0.4616	10629400	1.04	0.21	0	0	1	2017	0	115	1	0	7.00821	10190733	0	1	0	0	1	0	0	0	0	1	0	0	0	0	0	0	2	0	5	500	0	0	1	0	1	1	1	14	17	17	1	0	0	0
Rialto.AI	XRL	1.7162	17077550	1.8	2.26	0	0	1	2017	3	30	0.75	0.15	7	10000000	1	1	0	0	1	0	0	0	0	1	0	0	0	0	0	0	2	1	8	363.75	1	0	2	0.625	0.375	1	1	3	0	0				0
adToken	ADT	1.2419	17081820	1.41	1.78	0	0	1	2017	0	38	0.5	0.4	7	10000000	0	1	0	0	0	0	0	1	0	1	0	0	0	0	0	1	1	1	12	385.67	0	0	1	0.4167	0.5833	1	1	11	6	6	1	0	0	1
Token as a Service	TAAS	1.3934	23532737	2.87	0.82	0	0	1	2017	32	97	1	0	6.91501	8222582	1	1	0	0	1	0	0	0	0	1	0	0	0	0	0	0	2	0	7	357.14	1	0	2	0.1429	0.5714	1	1	14	12	12	1	0	0	1
NVO	NVST	0.6725	5635905	0.72	0.83	0	0	1	2017	31	37	1	0	6.89157	7790557	1	1	0	0	0	0	0	0	1	0	0	0	0	0	0	2	0	2	4	152	0	0	1	0.75	0.25	1	1	2	0	0				1
Primalbase	PBT					0	0	1	2017	0	38	0.8	0.2	6.88166	7614809	1	0	0	0	0	0	0	0	0	1	1	0	0	0	0	0	1	0	1	0	1	0	1	0	1	1	1	0	2	2	0	1	0	0
Patientory	PTOY	25.6587	10475290	28.11	28.17	0	0	1	2017	3	61	0.7	0.1	6.85858	7220655	0	1	0	0	0	0	0	0	0	1	0	0	0	0	0	1	0	2	7	500	0	0	1	0.5714	0.4286	1	1	4	8	8	1	0	0	0
ZrCoin	ZRC	0	3038075	0	0	0	0	1	2017	29	55	1	0	6.8451	7000000	1	1	0	0	0	0	0	0	0	0	1	0	0	0	0	0	2	0	6	0	1	0	1	0	1	1	1	0	0	0	0	1	0	0
Humaniq	HMQ	0.1718	25746622	0.36	0.09	0	0	1	2017	21	98	0.86		6.83446	6830564	1	1	0	0	1	0	0	0	0	1	0	0	0	0	0	0	1	0	6	416.67	1	0	4	0	0.8333	1	1	28	16	14	1	0	0	0
CoinDash	CDT					0	0	1	2017	0	17	0.5	0.1	6.78263	6062160	0	1	0	0	1	0	0	0	0	1	0	0	0	0	0	0	1	0	0	0	0	0	0	0	0	0	0	0	0	0				1
Aeternity (1st)	AE	4.1769		9.82	2.01	0	0	1	2017	3	119	0.82	0.17	6.76778	5858350	1	1	1	0	0	0	0	0	0	1	0	0	0	0	0	2	1	2	12	298.92	1	0	7	0.5	0.5	1	1	7	4	0	1	0	0	0
Exscudo	EON	0	0	0	0	0	0	1	2017	36	64	0.628	0.12	6.72329	5287923	1	0	0	0	1	0	0	0	0	0	0	0	0	0	0	2	2	1	10	179.2	1	0	4	0.7	0.3	1	1	9	0	0	0	1	0	0
Matchpool	GUP	0.5876	9136350	1.4	0.28	0	0	1	2017	2	121	0.6	0.2	6.71461	5183391	0	1	0	0	0	0	0	1	0	1	0	0	0	0	0	1	1	2	9	202.56	0	0	3	0.1111	0.4444	1	1	3	1	1				1
Air (Sphre)	XID	0.6857		0.75	1	0	0	1	2017	29	34	0.9	0.025	6.71247	5157903	1	0	0	0	0	0	0	0	0	1	0	0	0	0	0	1	1	2	5	327.6	0	0	2	0.4	0.6	1	1	3	4	4	1	0	0	0
DCORP	DRP					0	0	1	2017	28	35	0.825	0.175	6.7032	5048937	0	1	0	0	1	0	0	0	0	1	0	0	0	0	0	2	1	1	10	393.9	0	0	3	0.2	0.8	1	1	0	0	0				0
Starta	STA		2614765			0	0	1	2017	30	19	0.9455		6.70191	5033960	1	1	0	0	1	0	0	0	0	0	1	0	0	0	0	0	1	0	0	0	0	0	0	0	0	0	0	0	0	0				1
Zengold	ZENGOLD	0.5657		0.65	0.51	0	0	1	2017	0	69	0.63	0.175	6.68069	4793940	1	1	0	0	1	0	0	0	0	0	0	0	0	0	1	0	1	0	0	0	0	0	0	0	0	0	0	0	0	0				1
EncryptoTel	ETT		8388146			0	0	1	2017	16	85	0.7		6.65485	4517000	1	1	0	0	0	0	0	1	0	0	1	0	0	0	0	1	0	1	3	27.33	1	0	1	0.6667	0.3333	1	1	2	0	0	0	1	0	0
Ecobit	ECOB		15373244			0	0	1	2017	30	56	0.05	0.15	6.65321	4500000	1	0	0	0	0	0	0	0	0	0	0	0	0	0	0	1	1	0	0	0	0	0	0	0	0	0	0	0	0	0				0
Dent	DENT					0	0	1	2017	14	8			6.64087	4373932	0	1	0	0	0	0	0	0	0	1	0	0	0	0	0	1	0	1	5	277.4	0	0	4	0.6	0.4	1	1	4	3	3				0
Quantum	QAU	3.0599	16402218	4.87	1.96	0	0	1	2017	30	80	0.3333		6.61518	4122708	1	0	0	0	1	0	0	0	0	1	0	0	0	0	0	1	1	0	0	0	0	0	0	0	0	0	0	0	0	0				0
Chronobank	TIME	0.8559	11084293	2.32	0.14	0	0	1	2017	62	169	0.88	0.12	6.61195	4092128	1	1	0	0	0	0	0	0	0	1	0	0	0	0	0	1	1	1	14	182.21	1	0	3	0.2857	0.7143	1	1	8	1	0	1	0	0	0
Cryptviser	CVC					0	0	1	2017	41	34	0.2946	0.3333	6.60243	4003434	1	1	0	0	0	0	0	0	0	1	0	0	0	0	0	0	0	1	6	35.83	0	0	1	0.1667	0.8333	1	1	0	0	0				1
Quantum Resistant Ledger	QRL	3.7984	17651972	4.4	3.37	0	0	1	2017	23	71	0.4952		6.59191	3907558	0	1	1	0	0	0	0	0	1	0	0	0	0	0	0	2	1	1	6	116.67	0	0	3	0.8333	0.1667	1	1	0	1	1				0
WeTrust	TRST	1.3829	13358439	3.09	0.61	0	0	1	2017	41	113	0.8	0.1	6.57663	3772479	0	1	0	0	1	0	0	0	0	1	0	0	0	0	0	1	2	1	8	236.75	0	0	2	0.5	0.5	1	1	9	7	7	1	0	0	0
Dfinity	DFN					0	0	1	2017	1	171	1	0	6.49074	3095535	1	0	0	0	0	0	0	0	0	0	0	0	0	0	0	2	0	1	20	287.2	0	0	3	0.65	0.35	1	1	3	0	0	1	0	0	0
Internet of Coins	HYBRID					0	0	1	2017	92	43			6.47712	3000000	1	1	0	0	1	0	0	0	0	1	0	0	0	0	0	2	0	1	13	301.23	1	0	6	0.4615	0.5385	1	1	5	3	2				1
Melonport	MLN	2.9935	28443688	8.11	0.48	0	0	1	2017	0	169	0.6672	0.3328	6.46648	2927414	0	1	0	0	1	0	0	0	0	1	0	0	0	0	0	1	1	1	6	418.67	0	0	4	0.5	0.5	1	1	6	3	0	1	0	0	0
FootballCoin	XCF					0	0	1	2017	30	41	0.15		6.4514	2827467	0	1	0	0	0	0	0	0	0	0	0	0	1	0	0	0	0	1	0	0	0	0	0	0	0	0	0	0	0	0	1	0	0	0
E-Coin	ECN	55.6471	11523627	121.67	15.72	0	0	1	2017	35	141	0.8	0.18	6.4491	2812537	1	1	0	0	1	0	0	0	0	0	0	0	0	0	0	0	1	0	3	0	0	0	0	0.3333	0.6667	0	0	0	0	0				0
Edgeless	EDG	5.1473	37634058	12.93	2.47	0	0	1	2017	21	135	0.5902	0.1	6.43648	2732002	0	1	0	0	0	1	0	0	0	1	0	0	0	0	0	1	1	1	5	235.8	0	0	1	0.6	0.4	1	1	6	2	2	1	0	0	0
BOScoin (Presale)						0	0	1	2017	91	184	0.2678	0.08	6.42288	2647743	1	0	1	0	0	0	0	0	0	0	0	0	0	0	0	2	1	1	15	0	0	0	1	0.4667	0.5333	1	1	3	1	1	0	0	1	0
Lunyr	LUN	1.1178	6386722	2.3	0.66	0	0	1	2017	30	97	0.78	0.15	6.4113	2578128	0	1	0	0	0	0	0	1	0	1	0	0	0	0	0	2	0	0	3	500	0	0	1	0.6667	0.3333	1	1	4	2	2	1	0	0	0
CryptoPing	PING	135.567	1162523	0.39	418.33	0	0	1	2017	31	39	0.9	0	6.4082	2559791	1	1	0	0	1	0	0	0	0	0	1	0	0	0	0	0	0	1	0	0	0	0	0	0	0	0	0	0	0	0				0
Bitquence	BQX					0	0	1	2017	18	18			6.35543	2266876	0	1	0	0	1	0	0	0	0	1	0	0	0	0	0	0	1	0	10	274.9	0	0	2	0.4	0.6	1	1	6	0	0				0
Wings	WINGS	4.6148	30186585	13.53	0.62	0	0	1	2017	49	209	0.75	0.25	6.27252	1872929	1	1	0	0	1	0	0	0	0	1	0	0	0	0	0	1	2	1	9	241.22	1	0	3	0.6667	0.3333	1	1	5	5	2	1	0	0	0
Ethereum Movie Venture	EMV	0.2516	2870560	0.57	0.13	0	0	1	2017	29	108	0.9243	0.0757	6.25527	1800000	0	1	0	0	0	0	0	1	0	1	0	0	0	0	0	0	0	2	46	15.37	0	0	1	0	1	1	0	2	0	0	1	0	0	0
Blockpool	BPL					0	0	1	2017	60	34	0.8	0	6.2434	1751444	1	1	1	0	0	0	0	0	1	0	0	0	0	0	0	2	0	0	7	264.86	0	0	2	0.5714	0.4286	1	0	7	5	0	1	0	0	0
The Legends Room	LGD	0.4907	1733656	0.77	0.31	0	0	1	2017	27	80	0.0366		6.08884	1227000	1	0	0	0	0	0	0	0	0	0	0	0	1	0	0	0	0	1	3	121.67	0	0	1	0	1	1	0	0	0	0	1	0	0	1
Ethbits	ETB	0	320867	0.13	0.04	0	0	1	2017	30	80	0.8	0.04	6.08751	1223232	1	0	0	0	1	0	0	0	0	1	0	0	0	0	0	1	1	1	3	195.33	1	0	3	0.3333	0.6667	1	1	3	3	3				1
Augmentorsgame	DTB	3.4873	13241636	7.99	0.56	0	0	1	2017	29	156	0.7	0.3	6.02814	1066947	1	0	0	0	0	0	1	0	0	0	0	0	1	0	0	2	0	2	5	295.6	0	0	1	0.8	0.2	1	1	6	1	1	0	0	0	0
Back to Earth	STRC					0	0	1	2017	2	97	0.2		5.99789	995160			0	0	0	0	0	1	0	1	0	0	0	0	0	0	0	0	4	187.5	0	0	1	0	1	1	1	5	2	1				0
Adel (1st)	ADL	1.4891	1239136	1.84	1.86	0	0	1	2017	30	64	0.3333	0	5.98023	955508	1	0	0	0	0	0	0	0	0	0	0	0	0	1	0	0	2	1	22	244.68	1	0	9	0.3182	0.6818	1	1	0	0	0				0
Aira	AIR					0	0	1	2017	3	67	0.75	0.15	5.93666	864300			0	0	0	0	0	0	0	0	0	0	0	0	0	0	1	0	7	20.71	1	0	2	0.7143	0.2857	1	0	0	2	1	0	1	0	0
BitConnect	BCCOIN	76.8	425549778	385.65	17.94	0	0	1	2017	56	205	0.1714		5.91169	816000	1	0	0	0	1	0	0	0	1	0	0	0	0	0	0	0	2	1	0	0	0	0	0	0	0	0	0	0	0	0	1	0	0	0
E4ROW	E4ROW	0.7482	4168000	0.93	0.67	0	0	1	2017	21	72			5.90458	802750	0	1	0	0	1	0	0	0	0	1	0	0	0	0	0	0	1	0	0	0	0	0	0	0	0	0	0	0	0	0				0
Particl	PART					0	0	1	2017	28	110			5.87506	750000	1	0	0	0	1	0	0	0	1	0	0	0	0	0	0	2	1	1	12	181.33	0	0	5	0.6667	0.3333	1	0	3	3	2				0
Voise	VSM					0	0	1	2017	31	58			5.81058	646519	0	1	0	0	0	0	0	1	0	1	0	0	0	0	0	0	0	1	0	0	0	0	0	0	0	0	0	0	0	0				1
Equibit	EDC	0.0001		0	0	0	0	1	2017	59	124	0.2293		5.75486	568664	1	0	0	0	1	0	0	0	1	0	0	0	0	0	0	1	1	1	5	391	0	0	2	0.6	0.4	1	1	7	0	0	1	0	0	0
BetKing	BKB					0	0	1	2017	31	214	0.7	0.3	5.75421	567824	1	1	0	0	0	1	0	0	0	1	0	0	0	0	0	0	1	1	0	0	0	0	0	0	0	0	0	0	0	0				0
PeerPlays (2nd)	PPY		37046543			0	0	1	2017	77	81			5.51687	328751	1	0	0	0	0	1	0	0	0	0	0	0	0	0	1	0	1	0	0	0	0	0	0	0	0	0	0	1	0	0	1	0	0	1
Contingency	CTY					0	0	1	2017	28	156	0.9		5.48729	307104			0	0	0	1	0	0	0	0	0	0	0	0	0	0	1	0	0	0	0	0	0	0	0	0	0	0	0	0				1
Creativechain	CREA	2.6618	1745522	5.2	1.8	0	0	1	2017	47	94	0.0691	0.1	5.46531	291952	1	0	0	0	0	0	0	1	0	1	0	0	0	0	0	0	1	2	9	192.44	0	0	1	0.4444	0.4444	1	1	4	3	2	1	0	0	0
Etheroll	DICE	46.3109	26018038	106.35	6.99	0	0	1	2017	14	157	0.7369		5.46389	291000			0	0	0	1	0	0	0	1	0	0	0	0	0	1	2	1	0	0	0	0	0	0	0	0	0	0	0	0				0
Suretly (Pre-ICO)	SUR					0	0	1	2017	2	77			5.43355	271365	1	1	0	0	1	0	0	0	0	1	0	0	0	0	0	0	1	0	0	0	0	0	0	0	0	0	0	0	0	0				0
Octanox	OTX	1.0483	684560	7.92	1.54	0	0	1	2017	30	39	0.1413	0.16	5.4335	271332			0	0	1	0	0	0	1	0	0	0	0	0	0	1	1	0	4	134.5	0	0	2	0.5	0.5	1	1	0	0	0	0	0	0	0
Gilgam.es	GGS					0	0	1	2017	30	14			5.3998	251074			0	0	0	0	1	0	0	1	0	0	0	0	0	0	0	1	0	0	0	0	0	0	0	0	0	0	0	0				1
Crypto Forecast	CFT	9.947	582958	14.13	6.12	0	0	1	2017	34	76	0.92	0.045	5.38086	240360			0	0	1	0	0	0	0	0	0	1	0	0	0	0	1	1	8	59.25	0	0	2	0.375	0.625	0	0	0	0	0	0	0	0	0
Ahoolee (presale)	AHC					0	0	1	2017	0	31			5.32945	213526	0	1	0	0	0	0	0	0	0	1	0	0	0	0	0	0	1	0	8	46.13	1	0	1	0.75	0.25	1	1	0	0	0	0	1	0	0
AppTrade	APPX					0	0	1	2017	61	95			5.31449	206294			0	0	0	0	0	0	0	0	0	0	0	0	0	1	1	1	0	0	0	0	0	0	0	0	0	0	0	0	1	0	0	0
Cash Scripter	XCS					0	0	1	2017	30	125	0.4	0.3333	5.26951	186000			0	0	1	0	0	0	1	0	0	0	0	0	0	0	0	0	5	89.8	1	0	1	0.8	0.2	1	0	0	0	0				0
Mainstreet Investment	?	1	0	1		0	0	1	2017	3	154			5.17609	150000			0	0	1	0	0	0	0	0	0	0	0	0	0	0	1	0	0	0	0	0	0	0	0	0	0	0	0	0				1
Santiment (Presale)	SAN	8.3302	12293609	22.94	1.19	0	0	1	2017	0	171			5.13647	136920	0	1	0	0	0	0	0	0	0	1	0	0	0	0	0	1	2	2	9	195.11	1	1	6	0.5556	0.4444	1	0	6	0	0				0
Smartplay.Tech / Roulette	RLT	1.0291	1164375	2.32	101.96	0	0	1	2017	3	115	0.25	0.25	5.10089	126150	0	1	0	0	0	1	0	0	0	1	0	0	0	0	0	0	1	1	0	0	0	0	0	0	0	0	0	0	0	0	0	0	0	0
OnPlace	OPL	1	0	1	1	0	0	1	2017	0	58			5.00126	100290	0	1	0	0	1	0	0	0	0	1	0	0	0	0	0	0	1	0	0	0	0	0	0	0	0	0	0	0	0	0	1	0	0	0
Sikoba (Presale)	SKO	1	0	1	1	0	0	1	2017	30	71			4.96802	92900	1	0	0	0	1	0	0	0	0	1	0	0	0	0	0	0	0	0	4	378	0	0	2	0	1	1	1	0	0	0
FuckToken	FUCK	9.4742	1844066	11.43	10.66	0	0	1	2017	0	20	0.3105	0.2964	4.91479	82184	0	1	0	0	0	0	0	1	0	1	0	0	0	0	0	0	0	1	0	0	0	0	0	0	0	0	0	0	0	0				1
Tokes	TKS	1.0431	1110809	3.44	0.15	0	0	1	2017	46	199			4.90902	81100	1	0	0	0	1	0	0	0	0	0	1	0	0	0	0	1	1	1	8	102	0	0	2	0.625	0.375	1	1	0	0	0	1	0	0	0
ProCurrency	PROC		635037			0	0	1	2017	40	157	0.85	0.15	4.88649	77000			0	0	1	0	0	0	0	0	0	0	0	0	0	1	1	1	7	71.43	0	0	1	0.7143	0.2857	0	0	0	0	0				0
POS Wallet	POSW	5.8	1528965	21.31		0	0	1	2017	356	-107	0.5857	0.225	4.78517	60978	1	0	0	0	0	0	0	0	1	0	0	0	0	0	0	1	1	0	0	0	0	0	0	0	0	0	0	0	0	0				1
BitcoinGo	BTG					0	0	1	2017	33	203			4.77743	59900			0	0	1	0	0	0	0	0	0	0	0	0	0	0	0	1	0	0	0	0	0	0	0	0	0	0	0	0				1
Useless Ethereum Token	UET	1.7357	120298	2.04	1.76	0	0	1	2017	10	22			4.77151	59090	0	1	0	0	0	0	0	0	0	1	0	0	0	0	0	0	0	0	0	0	0	0	0	0	0	0	0	0	0	0				1
PassLfix	PASS					0	0	1	2017	30	214			4.64945	44612			0	0	0	0	0	0	0	1	0	0	0	0	0	1	1	0	0	0	0	0	0	0	0	0	0	0	0	0	0	1	0	1
MetaGold	MEG	1	0	1	0	0	0	1	2017	5	117	0.75	0.1125	4.55574	35953	1	1	0	0	0	0	1	0	0	1	0	0	0	0	0	0	0	0	0	0	0	0	0	0	0	0	0	0	0	0
CryptoJournal	CJC					0	0	1	2017	3	112	1	0.01	4.5537	35785	1	0	0	0	0	0	0	1	0	0	0	0	0	0	0	0	0	1	0	0	0	0	0	0	0	0	0	0	0	0
Chatcoin	CHAT					0	0	1	2017	3	132			4.39737	24967	1	0	0	0	0	0	0	1	1	0	0	0	0	0	0	0	0	1	0	0	0	0	0	0	0	0	0	0	0	0				1
Spectre	XSPEC	52.1572	3975435	0.7	6.88	0	0	1	2017	49	207			4.31385	20599	1	0	0	0	0	0	0	0	1	0	0	0	0	0	0	2	1	2	4	0	0	0	0	0.5	0.5	0	0	0	0	0	1	0	0
300 Token	300					0	0	1	2017	5	28	0.7	0.3	4.22425	16759	0	1	0	0	0	0	0	0	0	1	0	0	0	0	0	0	0	1	0	0	0	0	0	0	0	0	0	0	0	0				1
Chain of Points	POINTS					0	0	1	2017	33	125			4.0607	11500	1	0	0	0	1	0	0	0	1	0	0	0	0	0	0	1	0	1	3	0	1	0	2	0.3333	0.6667	1	1	4	3	3	1	0	0	1
SwishCoin	SWH					0	0	1	2017	31	200	0.25		3.95395	8994	1	0	0	0	1	0	0	0	1	0	0	0	0	0	0	0	0	0	0	0	0	0	0	0	0	0	0	0	0	0				1
Branche	BLT					0	0	1	2017	28	213			3.79934	6300	0	1	0	0	1	0	0	0	0	1	0	0	0	0	0	1	0	1	1	0	0	0	0	0	0	1	1	0	0	0	1	0	0
Respectonomy	RES					0	0	1	2017	26	152			3.63043	4270	1	0	0	0	0	0	0	1	1	0	0	0	0	0	0	1	1	0	7	0	0	0	0	0.4286	0.5714	0	0	0	0	0	0	0	1	0
Icobid	n/a					0	0	1	2017	31	204			3.17609	1500	1	0	0	0	0	0	0	0	0	0	0	0	0	0	0	1	0	1	0	0	0	0	0	0	0	0	0	0	0	0				1
TheDao	DAO	0	0	0	0	0	1	0	2016	28	432	1	0	8.1387	137624640	1	0	0	0	1	0	0	0	0	1	0	0	0	0	0	0	0	0	0	0	0	0	0	0	0	0	0	0	0	0	0	0	0	0
Waves	WAVES	3.8493	374960000	19.69	1.24	0	1	0	2016	50	428	0.85	0.09	7.19994	15846782	1	0	1	0	0	0	0	0	1	0	1	0	0	0	0	2	2	2	13	148.23	1	0	3	0.5385	0.4615	1	1	0	0	0	0	1	0	0
Iconomi	ICN	1.8202	283275153	26.31	1.56	0	1	0	2016	35	308	0.85	0.08	7.0239	10565642	1	1	0	0	1	0	0	0	0	1	0	0	0	0	0	1	2	1	20	199.25	1	0	3	0.5	0.5	1	1	13	0	0	1	0	0	0
Golem	GNT	6.2775	216480859	23.98	1.14	0	1	0	2016	0	265	0.82	0.18	6.93038	8518885	0	1	0	1	0	0	0	0	0	1	0	0	0	0	0	0	1	2	15	207.33	1	0	2	0.6	0.0667	1	1	9	0	0	1	0	0	0
SingularDTV	SNGLS	1.6104	66415800	103.37	0.43	0	1	0	2016	0	305	0.5	0.4	6.88871	7739393	0	1	0	0	0	0	0	1	0	1	0	0	0	0	0	1	0	1	4	488.75	0	0	2	0	1	1	1	10	9	5	1	0	0	1
Lisk	LSK	4.1673	228606133	27.69	1.49	0	1	0	2016	28	500	0.85	0.08	6.79454	6230700	1	0	1	0	0	0	0	0	1	0	0	0	0	0	0	2	2	2	15	156.4	1	0	5	0.7333	0.2667	1	1	7	0	0	1	0	0	0
FirstBlood	1ST	2.0767	62829447	9.31	0.54	0	1	0	2016	0	311	0.8463	0.0846	6.78742	6129457	0	1	0	0	0	0	1	0	0	1	0	0	0	0	0	2	1	2	4	480.2	0	0	2	0.75	0.5	1	1	11	4	2	1	0	0	1
Digix	DGD	3.3667	140154400	22.17	1.19	0	1	0	2016	0	491	0.85	0.15	6.74159	5515616	0	1	0	0	1	0	0	0	0	1	0	0	0	0	0	1	1	0	0	0	0	0	0	0	0	0	0	0	0	0	0	0	0	0
Synereo (1st)	AMP	9.9859	20881426	42.98	2.35	0	1	0	2016	20	287	0.5061		6.67223	4701421	1	0	0	0	0	0	0	0	0	0	0	1	0	0	0	2	0	2	0	0	0	0	0	0	0	0	0	0	0	0				0
Decent	DCT	2.7108	45973437	10.49	0.52	0	1	0	2016	57	269	0.6999	0	6.61851	4154420	1	0	1	0	0	0	0	0	1	0	0	0	0	0	0	1	1	1	26	187.96	1	1	5	0.2692	0.7308	1	1	43	7	6	1	0	0	0
NEO (AntShares)	ANS	10.4551	453896500	46.37	2.43	0	1	0	2016	30	330	0.2	0.1	6.57626	3769322	1	0	1	0	0	0	0	0	1	0	0	0	0	0	0	2	1	1	11	62.45	0	1	1	0.4545	0.5455	1	1	12	0	0	0	0	1	0
Mycelsium	SAR	0.0001	1319.8	0	0	0	1	0	2016	17	441	1	0	6.367	2328077	1	0	0	0	0	0	0	0	1	0	0	0	0	0	0	1	0	1	0	0	0	0	0	0	0	0	0	0	0	0	1	0	0	1
Metaverse	ETP					0	1	0	2016	31	332			6.36225	2302770	1	0	1	0	0	0	0	0	1	0	0	0	0	0	0	2	1	1	0	0	0	0	0	0	0	0	0	0	0	0
Lykke (2nd round)	LKK	3.9586	64544410	17.4	0.93	0	1	0	2016	28	296	0.1043		6.29554	1974898	1	1	0	0	1	0	0	0	1	0	0	0	0	0	0	1	1	1	13	343.08	1	0	5	0.3077	0.6923	1	1	54	0	0				0
Komodo	KMD	2.6679	96103255	9.83	0.43	0	1	0	2016	36	256			6.29187	1958270	1	0	0	0	0	0	0	0	1	0	0	0	0	0	0	2	1	1	16	0	0	0	0	0.4375	0.5625	0	0	0	7	0	0	0	0	0
Kibo	KBT					0	1	0	2016	10	296			6.27759	1894900	0	1	0	0	0	1	0	0	0	1	0	0	0	0	0	0	1	1	0	0	0	0	0	0	0	0	0	0	0	0				0
vSlice	VSL	5.3549	31166923	18.84	0.7	0	1	0	2016	30	231	1	0	6.21669	1647000	0	1	0	0	0	1	0	0	0	1	0	0	0	0	0	1	0	1	0	0	0	0	0	0	0	0	0	0	0	0				0
Asch	XAS	7.1029	38967675	28.85	1.38	0	1	0	2016	21	393	0.75	0.25	6.1306	1350820	1	0	1	0	0	0	0	0	1	0	0	0	0	0	0	1	1	1	0	0	0	0	0	0	0	0	0	0	0	0	0	0	1	0
ETCWin	WIN					0	1	0	2016	37	253			6.11694	1309000	1	0	0	0	1	0	0	0	0	0	0	0	0	0	0	0	0	1	0	0	0	0	0	0	0	0	0	0	0	0				1
Lykke (1st round)	LKK		64544410			0	1	0	2016	28	297			6.05949	1146800	1	1	0	0	1	0	0	0	1	0	0	0	0	0	0	1	1	1	13	343.08	1	0	5	0.3077	0.6923	1	1	54	0	0				0
Rise	RISE	1.3867	8512176	5.78	0.36	0	1	0	2016	45	405	0.88	0.09	6.05073	1123899			1	0	0	0	0	0	1	0	0	0	0	0	0	1	0	1	0	0	0	0	0	0	0	0	0	0	0	0				1
Incent	INCNT	0.6744	4846772	2.46	0.1	0	1	0	2016	61	245	0.5		6	1000000	1	0	0	0	0	0	0	1	0	0	1	0	0	0	0	1	1	0	4	297.5	0	0	1	0	1	1	1	0	0	0	1	0	0	0
ARK	ARK	14.9065	56288022	53.04	1.95	0	1	0	2016	34	235	0.7517	0.2483	5.99913	998000	1	0	1	0	0	0	0	0	1	0	0	0	0	0	0	2	1	1	25	89.84	1	0	6	0.4	0.6	1	1	0	2	0				0
Plutus	PLU	2.7701	11273628	11.45	0.65	0	1	0	2016	8	399	0.0425		5.99364	985460	1	0	0	0	1	0	0	0	0	0	0	0	0	0	0	0	2	1	6	500	0	0	2	0.1667	0.8333	1	1	6	0	0	1	0	0	0
Heat	HEAT	1.3787	8175525	6.35	0.32	0	1	0	2016	28	360			5.98542	966993	1	1	1	0	0	0	0	0	1	0	0	0	0	0	0	1	1	1	2	73	0	0	2	0.5	0.5	1	0	0	0	0	1	0	0	0
Xaurum (ICO/swap)	XAUR	4.9599	28341254	20.5	1.16	0	1	0	2016	12	369			5.9301	851342	1	1	0	0	1	0	0	0	0	1	0	0	0	0	0	0	1	1	1	50	0	0	1	0	1	1	1	0	3	1				0
Lepaoquan	HLB	0.8836	0	3.94	0.21	0	1	0	2016	9	322			5.92745	846161	1	0	0	0	1	0	0	0	0	0	0	0	0	0	0	0	1	0	0	0	0	0	0	0	0	0	0	0	0	0	0	0	1
Playground Credit	PGC					0	1	0	2016	10	234	0.8333	0.1667	5.88915	774730			0	0	1	0	0	0	0	0	0	0	0	0	0	0	0	0	0	0	0	0	0	0	0	0	0	0	0	0	0	0	1	1
Roundcoin	ROUND	11.8333	33049445	43.56	1.9	0	1	0	2016	0	256	0.84	0.16	5.87389	747986	0	1	0	0	0	0	1	0	0	1	0	0	0	0	0	0	0	1	0	0	0	0	0	0	0	0	0	0	0	0	0	0	0	1
BlockPay	BLOCKPAY	0.3576	1487137	1.62	0.09	0	1	0	2016	15	333	0.0397	0.0879	5.82187	663551			0	0	1	0	0	0	1	0	0	0	0	0	0	1	1	1	9	111.11	0	0	1	0.1111	0.8889	0	1	9	0	0				0
Hong Coin	Ħ	1	0	1		0	1	0	2016	60	247			5.80072	632000	0	1	0	0	1	0	0	0	0	1	0	0	0	0	0	0	1	0	0	0	0	0	0	0	0	0	0	0	0	0				1
Swarm City	SWT	2.5896	8562479	9.65		0	1	0	2016	28	247			5.80072	632000	0	1	0	0	0	0	0	0	0	1	0	0	0	0	0	1	1	2	0	0	0	0	0	0	0	0	0	0	0	0	1	0	0	1
Stratis	STRAT	187.187	562999126	779.76	42.27	0	1	0	2016	35	373	0.8571	0.1429	5.77817	600030	1	0	1	0	0	0	0	0	1	0	0	0	0	0	0	2	1	2	8	132.23	0	0	4	0.625	0.375	1	1	18	2	2	1	0	0	0
Virtual Accelerator	HKG	0.602	1107814	2.01	0.07	0	1	0	2016	62	225	1	0	5.7665	584123	0	1	0	0	1	0	0	0	0	1	0	0	0	0	0	0	0	0	0	0	0	0	0	0	0	0	0	0	0	0				1
Breakout Chain (2nd)	BRK	0.1587	1507570	0.67	0.03	0	1	0	2016	24	392	0.2441	0.14	5.73898	548248	1	0	0	0	0	1	1	0	1	0	0	0	0	0	0	1	0	0	1	0	0	0	0	0	0	1	1	0	0	0	1	0	0	0
ION	ION	0.9873	19282783	5.85	0.29	0	1	0	2016	42	444	0.2512		5.73848	547619			0	0	1	0	0	0	1	0	0	0	0	0	0	1	1	0	0	0	0	0	0	0	0	0	0	0	0	0				0
Arcade City	ARC	3.4558	1948873	12.89	0.52	0	1	0	2016	27	248	0.84		5.72697	533304			0	0	0	0	0	0	0	1	0	0	0	0	0	0	1	2	0	0	0	0	0	0	0	0	0	0	0	0	1	0	0	1
Golos	GOLOS	1.8201	14824721	0.01	0.23	0	1	0	2016	33	242	0.6		5.66222	459433			0	0	0	0	0	1	1	0	0	0	0	0	0	2	1	1	0	0	0	0	0	0	0	0	0	0	0	0	0	1	0	0
Red Sea Shells	RSS					0	1	0	2016	19	251			5.64444	441006	1	0	0	0	0	0	0	0	0	0	0	0	0	0	0	0	1	0	0	0	0	0	0	0	0	0	0	0	0	0				0
Project Decorum	PDC	0.9099	2467385	5.55	0.25	0	1	0	2016	28	458	1	0	5.62645	423109			0	0	0	0	0	0	0	0	0	0	0	0	0	0	1	0	1	0	0	0	1	1	0	1	1	0	0	0				0
Elastic	XEL	18.7042	31266442	88.37	4.28	0	1	0	2016	172	349			5.61336	410543			0	1	0	0	0	0	1	0	0	0	0	0	0	1	1	0	0	0	0	0	0	0	0	0	0	0	0	0				1
ICO Openledger	ICOO	1.3977	2126812	5.83	0.35	0	1	0	2016	66	374	1	0	5.57915	379447			0	0	0	0	0	0	0	0	0	0	0	0	1	1	1	1	8	149.25	0	0	4	0.625	0.375	1	1	0	2	2				0
BlockCDN	BCDN					0	1	0	2016	27	221	0.4	0	5.5778	378264			0	0	1	0	0	0	0	1	0	0	0	0	0	0	0	1	9	111.11	0	1	3	0.7778	0.2222	1	1	0	2	0	0	0	1	0
Bankcoin (1st)	B@	2.266	8709694	7.85	0.28	0	1	0	2016	44	227			5.50651	321000			0	0	0	0	0	0	0	0	1	0	0	0	0	1	1	0	4	0	0	0	0	0.25	0.75	1	1	0	0	0				0
Beyond the Void	NXC	5.1508	12612027	18.81	0.73	0	1	0	2016	30	245	0.3138	0.15	5.47613	299316	0	1	0	0	0	0	1	0	0	1	0	0	0	0	0	2	1	2	0	0	0	0	0	0	0	0	0	0	0	0				0
Darcrus	DAR	3.7137	3795389	10.63	0.34	0	1	0	2016	6	218			5.46756	293468			0	0	0	0	0	0	0	0	0	0	0	1	0	0	0	1	0	0	0	0	0	0	0	0	0	0	0	0	1	0	0	1
Obits	OBITS	8.6794	14861638	62.34	0.66	0	1	0	2016	61	550	1	0	5.38967	245287			0	0	0	0	0	0	0	0	0	0	0	0	0	1	0	1	0	0	0	0	0	0	0	0	0	0	0	0				0
DeClouds	DCS	0	0	0	0	0	1	0	2016	61	301			5.26921	185869	1	0	0	1	0	0	0	0	1	0	0	0	0	0	0	0	0	0	0	0	0	0	0	0	0	0	0	0	0	0				1
VeriumReserve (1st)	VRM	0	4905297	0	0	0	1	0	2016	11	368			5.26738	185087	1	0	0	0	1	0	0	0	1	0	0	0	0	0	0	1	0	0	0	0	0	0	0	0	0	0	0	0	0	0				0
Mass Network						0	1	0	2016	91	245			5.25565	180158			0	0	0	0	0	0	1	0	0	0	0	0	0	1	0	1	4	125	0	0	1	0.25	0.75	1	1	2	0	0	1	0	0	0
Blocksafe	TRIG	3.369	2088966	14.88	0.86	0	1	0	2016	28	301	0.3211		5.14743	140420			0	0	0	0	0	0	0	0	0	0	1	0	0	1	0	2	6	324.6	0	0	4	0.5	0.5	1	1	2	0	0	1	0	0	0
eBoost	EBST					0	1	0	2016	42	280	0.0084	0.5501	5.14613	140000			0	0	0	0	1	0	1	0	0	0	0	0	0	0	0	1	0	0	0	0	0	0	0	0	0	0	0	0				0
Breakout Chain (3rd)	BRX	0.156	1797949	0.65	0.04	0	1	0	2016	14	375	0.0504	0.3988	5.13752	137252	1	0	0	0	0	1	1	0	1	0	0	0	0	0	0	1	0	0	1	0	0	0	0	0	0	1	1	0	0	0	1	0	0	0
InChain	INC	1	0	1	0	0	1	0	2016	30	250	0.85	0.15	5.05895	114538	0	1	0	0	1	0	0	0	0	1	0	0	0	0	0	0	0	0	0	0	0	0	0	0	0	0	0	0	0	0				1
Tao Network	XTO	0.7541	535762	3.57	0.17	0	1	0	2016	15	352	0.9381	0.0511	5	100000	1	0	0	0	0	0	0	1	1	0	0	0	0	0	0	1	0	1	0	0	0	0	0	0	0	0	0	0	0	0				1
Nodio		0	0	0	0	0	1	0	2016	29	245			5	100000	1	1	0	0	0	0	0	0	0	0	0	0	0	0	0	0	0	0	0	0	0	0	0	0	0	0	0	0	0	0	1	0	0	1
VeriumReserve (2nd)	VRM	0	4905297	0	0	0	1	0	2016	17	350			4.94166	87430	1	0	0	0	1	0	0	0	1	0	0	0	0	0	0	1	0	0	0	0	0	0	0	0	0	0	0	0	0	0				0
Prism	PRM	0.0109	0	0	0	0	1	0	2016	27	480			4.82976	67571			1	0	0	0	0	0	1	0	0	0	0	0	0	0	0	0	0	0	0	0	0	0	0	0	0	0	0	0				1
EGAAS	EGS					0	1	0	2016	30	231	0.059		4.80942	64479			0	0	0	0	0	0	1	0	0	0	0	0	0	1	1	1	7	112.86	1	0	4	0.5714	0.4286	1	1	0	1	0				0
Safe Exchange	SAFEX	57.5685	19589754	362.57	1.56	0	1	0	2016	106	576	0.99	0.01	4.72179	52697			0	0	1	0	0	0	0	0	0	1	0	0	0	0	1	1	3	359.67	1	0	2	0.6667	0.3333	1	0	5	0	0	0	0	0	0
Mineum	MNM	0.5936	150333	3.09		0	1	0	2016	22	431			4.6981	49900	1	0	0	0	1	0	0	0	1	0	0	0	0	0	0	0	1	0	2	0	0	0	0	1	0	1	1	0	0	0				0
Opair	XPO	0	0	0	0	0	1	0	2016	31	342	1	0.01	4.69259	49271	1	0	1	0	0	0	0	0	1	0	0	0	0	0	0	0	0	0	0	0	0	0	0	0	0	0	0	0	0	0				1
Flashcoin	FLASH					0	1	0	2016	36	223			4.6902	49000	1	0	0	0	1	0	0	0	1	0	0	0	0	0	0	0	0	0	0	0	0	0	0	0	0	0	0	0	0	0	1	0	0	1
Luckchain (yobit sale)	BASH	7.7333	10115550	26.81	0.96	0	1	0	2016	30	228	0.0976	0.1	4.66407	46139	1	0	0	0	0	0	1	0	1	0	0	0	0	0	0	1	0	0	0	0	0	0	0	0	0	0	0	0	0	0				0
ForexCoin	FRX	0	0	0	0	0	1	0	2016	3	290			4.55025	35502	1	0	1	0	0	0	0	0	1	0	0	0	0	0	0	0	0	0	0	0	0	0	0	0	0	0	0	0	0	0				1
Salus	SLS	62.3732	9875103	443.8	2.83	0	1	0	2016	12	563	1	0.01	4.37025	23456	1	0	0	0	1	0	0	0	1	0	0	0	0	0	0	0	0	1	0	0	0	0	0	0	0	0	0	0	0	0				1
Bitpark (1st)	BPC	2.2099	4717380	211.35	0.53	0	1	0	2016	21	353	0.05		4.34226	21992	1	0	0	0	1	0	0	0	0	1	0	0	0	0	0	1	1	1	2	21	0	0	1	0.5	0.5	1	0	3	0	0	0	0	1	1
Ride My Car	RMC	0.2335	22009	1.02	0.06	0	1	0	2016	5	299	1	0.01	4.3295	21355	0	1	0	0	0	0	0	0	1	0	0	0	0	0	0	1	0	1	0	0	0	0	0	0	0	0	0	0	0	0				0
Shortycoin	SHORTY	4.04	290765	14.25	0.53	0	1	0	2016	3	234	1	0.01	4.28708	19368	1	0	0	0	0	0	0	1	1	0	0	0	0	0	0	0	0	0	0	0	0	0	0	0	0	0	0	0	0	0
Bitpark (2nd)	BPC	48.8893	4717380	300.52	11.49	0	1	0	2016	35	287	0.7	0.2	4.18921	15460	1	0	0	0	1	0	0	0	0	1	0	0	0	0	0	1	1	1	2	21	0	0	1	0.5	0.5	1	0	3	0	0	0	0	1	1
Ubiq	UBIQ					0	1	0	2016	6	310			4.18549	15328	1	0	0	0	1	0	0	0	1	0	0	0	0	0	0	2	2	2	4	125	0	0	1	0.75	0.25	1	1	0	0	0				1
BigUp	BIGUP	1	108281	6.49	0.28	0	1	0	2016	3	517			4.16859	14743	1	0	0	0	1	0	0	0	1	0	0	0	0	0	0	0	0	0	0	0	0	0	0	0	0	0	0	0	0	0				1
WayCoin	WAY	0	0	0	0	0	1	0	2016	7	336			4.15945	14436	1	0	0	0	0	0	0	1	1	0	0	0	0	0	0	0	0	0	0	0	0	0	0	0	0	0	0	0	0	0				1
TeamUp	TEAM	0.2857		1.23	0.07	0	1	0	2016	3	287			4.12483	13330	1	0	0	0	1	0	0	0	1	0	0	0	0	0	0	0	0	0	0	0	0	0	0	0	0	0	0	0	0	0
DigitalBlock	DBLK	0	0	0	0	0	1	0	2016	7	518			4.08091	12048	1	0	0	0	1	0	0	0	1	0	0	0	0	0	0	0	0	0	0	0	0	0	0	0	0	0	0	0	0	0
Accelerate	ACLR	0	0	0	0	0	1	0	2016	2	517			4.07166	11794	1	0	1	0	0	0	0	0	1	0	0	0	0	0	0	0	0	0	0	0	0	0	0	0	0	0	0	0	0	0
DustCoin	DUST	0	0	0	0	0	1	0	2016	2	547			3.87419	7485	1	0	0	0	1	0	0	0	1	0	0	0	0	0	0	0	0	0	0	0	0	0	0	0	0	0	0	0	0	0				1
EGO	EGO	0.45	14813	2	0.12	0	1	0	2016	4	304			3.86853	7388	1	0	0	0	1	0	0	0	1	0	0	0	0	0	0	0	0	0	0	0	0	0	0	0	0	0	0	0	0	0
Mercatox	MERCA					0	1	0	2016	30	226		0.05	3.75587	5700	0	0	0	0	1	0	0	0	1	0	0	0	0	0	0	1	1	0	0	0	0	0	0	0	0	0	0	0	0	0	1	0	0	1
SixAxis	SIX	0	0	0	0	0	1	0	2016	2	533			3.69775	4986	1	0	0	0	1	0	0	0	1	0	0	0	0	0	0	0	0	0	0	0	0	0	0	0	0	0	0	0	0	0
DarkMoon	MOOND	0	0	0	0	0	1	0	2016	2	545			3.6467	4433	1	0	0	0	1	0	0	0	1	0	0	0	0	0	0	0	0	0	0	0	0	0	0	0	0	0	0	0	0	0
VapersCoin	VPRC	1	8366	4.66	0.29	0	1	0	2016	2	418			3.46746	2934	1	0	0	0	1	0	0	0	1	0	0	0	0	0	0	0	0	0	0	0	0	0	0	0	0	0	0	0	0	0
iSunMediaCoin	n/a		0	0	0	0	1	0	2016	183	219			1.39794	25	1	0	0	0	0	0	0	1	1	0	0	0	0	0	0	0	0	0	0	0	0	0	0	0	0	0	0	0	0	0
Augur	REP	2.5079	189813800	28.72	0.09	1	0	0	2015	45	672	0.8	0.2	6.72078	5257569	1	1	0	0	0	0	0	0	0	1	0	0	0	0	0	2	2	2	9	293.78	0	0	1	0.6667	0.3333	1	1	11	7	4	1	0	0	0
Tau-Chain / Agoras	AGRS	0.267	12182226	1.62		1	0	0	2015	906	0	0.3028		6.33484	2161940	1	0	1	0	0	0	0	0	1	0	0	0	0	0	0	1	1	0	0	0	0	0	0	0	0	0	0	0	0	0	0	0	0	0
Neucoin	NEU	0	0	0		1	0	0	2015	3	825			5.92177	835156	1	0	0	0	1	0	0	0	1	0	0	0	0	0	0	0	1	0	0	0	0	0	0	0	0	0	0	0	0	0				1
GetGems	GEMZ	0	0	0.04		1	0	0	2015	24	910			5.76846	586764	1	0	0	0	0	0	0	1	0	0	0	0	1	0	0	0	0	0	0	0	0	0	0	0	0	0	0	0	0	0				1
DacPlay	PLS	0	0	0		1	0	0	2015	48	893	0.2		5.76431	581176	1	0	0	0	0	1	1	0	0	0	0	0	0	0	1	0	0	1	0	0	0	0	0	0	0	0	0	0	0	0	0	0	1	0
Factom	FCT	13.4489	168867976	154.05		1	0	0	2015	45	811	0.5		5.73504	543303	1	0	0	0	0	0	0	1	0	0	0	0	0	0	0	2	1	1	27	276	0	0	3	0.4815	0.5185	1	1	40	3	2	1	0	0	0
Iota	IOT	255.315	883129039	1568.16	6.49	1	0	0	2015	26	591	1	0	5.71693	521110	1	0	1	0	0	0	0	0	1	0	0	0	0	0	0	2	2	2	0	0	0	0	0	0	0	0	0	0	0	0	1	0	0	0
Voxelus	VOX	0.5542	13223658	4.17	0.02	1	0	0	2015	30	609			5.64837	445008	1	0	0	0	0	0	0	1	1	0	0	0	0	0	0	2	1	0	3	500	0	0	2	0.6667	0.3333	1	1	0	0	0	0	0	0
Gambit	GAM	21	6692279	33.76		1	0	0	2015	14	806	0.7961		5.52935	338339	1	0	0	0	1	0	0	0	0	0	0	0	0	0	0	0	2	0	0	0	0	0	0	0	0	0	0	0	0	0	0	0	0	1
Spells of Genesis (Bitcrystals)	BCY	2.3228	11308238	27.71	0.16	1	0	0	2015	29	701	0.1344	0.15	5.32925	213428	1	0	0	0	0	0	1	0	0	0	0	0	1	0	0	1	1	1	0	0	0	0	0	0	0	0	0	0	0	0				0
Cryptofund	FUND	0.2456	1621170	1.69	0.01	1	0	0	2015	17	671	0.9	0.1	4.87123	74342			0	0	1	0	0	0	1	0	0	0	0	0	0	0	2	0	0	0	0	0	0	0	0	0	0	0	0	0				1
SummitCoin	XMT	0	0	0	0	1	0	0	2015	6	637			4.60291	40078	1	0	1	0	0	0	0	0	1	0	0	0	0	0	0	0	0	0	0	0	0	0	0	0	0	0	0	0	0	0				1
Curvatures	CURVES	0	0	0		1	0	0	2015	3	735			4.36391	23116	1	0	1	0	0	0	0	0	1	0	0	0	0	0	0	0	0	0	0	0	0	0	0	0	0	0	0	0	0	0
BitVegan	VEG	0	0	0	0	1	0	0	2015	6	610			4.23338	17115	1	0	0	0	0	0	0	0	1	0	0	0	0	0	0	0	0	0	0	0	0	0	0	0	0	0	0	0	0	0
Transformers	TRANSF	0	0	0		1	0	0	2015	1	786			4.20839	16158	1	0	1	0	0	0	0	0	1	0	0	0	0	0	0	1	0	0	0	0	0	0	0	0	0	0	0	0	0	0
Zeta2 Coin	ZET2	0	0	0	0	1	0	0	2015	4	594			4.20534	16045	1	0	0	0	1	0	0	0	1	0	0	0	0	0	0	0	0	0	0	0	0	0	0	0	0	0	0	0	0	0
Samsara	SMSR	0	0	0		1	0	0	2015	4	775			4.16605	14657	1	0	0	0	1	0	0	0	1	0	0	0	0	0	0	0	0	0	0	0	0	0	0	0	0	0	0	0	0	0				1
Dubstep	DUB	0	0	0		1	0	0	2015	4	785			4.14236	13879	1	0	0	0	0	0	0	1	1	0	0	0	0	0	0	0	0	0	0	0	0	0	0	0	0	0	0	0	0	0
Social Media Advertising Coin	SMAC	0	0	0		1	0	0	2015	7	890	1	0.01	4.12307	13276	1	0	0	0	0	0	0	1	1	0	0	0	0	0	0	0	0	0	0	0	0	0	0	0	0	0	0	0	0	0
OsmiumCoin	OS76	0.0867	894026	8.84	0.02	1	0	0	2015	6	655			4.10938	12864	1	0	0	0	1	0	0	0	0	0	0	0	0	0	0	0	0	0	0	0	0	0	0	0	0	0	0	0	0	0
ODNT	ODNT	1.864	0	22.11	0.13	1	0	0	2015	6	702			4.0613	11516	1	0	1	0	0	0	0	0	1	0	0	0	0	0	0	0	0	0	0	0	0	0	0	0	0	0	0	0	0	0
BnB Coin	BNB	0	0	0		1	0	0	2015	3	788			4.04052	10978	1	0	0	0	1	0	0	0	1	0	0	0	0	0	0	0	0	0	0	0	0	0	0	0	0	0	0	0	0	0
ReturnCoin	RNC	0	0	0	0	1	0	0	2015	3	605			3.99405	9864	1	0	0	0	1	0	0	0	1	0	0	0	0	0	0	0	0	0	0	0	0	0	0	0	0	0	0	0	0	0
PSIcoin	PSI	0	0	0	0	1	0	0	2015	3	687			3.90439	8024	1	0	0	0	1	0	0	0	1	0	0	0	0	0	0	0	0	0	0	0	0	0	0	0	0	0	0	0	0	0
PHREAK	PHR	0	0	0	0	1	0	0	2015	2	692			3.86016	7247	1	0	0	0	1	0	0	0	1	0	0	0	0	0	0	0	0	0	0	0	0	0	0	0	0	0	0	0	0	0
RatioCoin	RATIO	0	0	0	0	1	0	0	2015	3	595			3.83474	6835	1	0	0	0	1	0	0	0	1	0	0	0	0	0	0	0	0	0	0	0	0	0	0	0	0	0	0	0	0	0
MasterMint	MM	0	0	0	0	1	0	0	2015	6	619			3.80243	6345	1	0	0	0	1	0	0	0	1	0	0	0	0	0	0	0	0	0	0	0	0	0	0	0	0	0	0	0	0	0
NUKE	NUKE	0	0	0		1	0	0	2015	2	756			3.79281	6206	1	0	0	0	1	0	0	0	1	0	0	0	0	0	0	0	0	0	0	0	0	0	0	0	0	0	0	0	0	0
Life Extension	EXT	0	0	0		1	0	0	2015	4	769			3.78583	6107	1	0	0	0	1	0	0	0	1	0	0	0	0	0	0	0	0	0	0	0	0	0	0	0	0	0	0	0	0	0
LimitedCoin	LTD	0	0	0	0	1	0	0	2015	3	689			3.75944	5747	1	0	0	0	1	0	0	0	1	0	0	0	0	0	0	0	0	0	0	0	0	0	0	0	0	0	0	0	0	0
GREXIT	GREXIT	0	0	0		1	0	0	2015	0	744			3.74827	5601	1	0	0	0	1	0	0	0	1	0	0	0	0	0	0	0	0	0	0	0	0	0	0	0	0	0	0	0	0	0
BreakCoin	BRE	0	0	0	0	1	0	0	2015	4	695			3.74492	5558	1	0	0	0	1	0	0	0	1	0	0	0	0	0	0	0	0	0	0	0	0	0	0	0	0	0	0	0	0	0				1
AmsterdamCoin	AMS	0.0238	23409	0.25		1	0	0	2015	2	717			3.71416	5178	1	0	0	0	1	0	0	0	1	0	0	0	0	0	0	0	0	0	0	0	0	0	0	0	0	0	0	0	0	0				1
SatoshiMadness	MAD	1	1.92058	38461.2		1	0	0	2015	2	716			3.71071	5137	1	0	0	0	0	0	0	1	1	0	0	0	0	0	0	0	0	0	0	0	0	0	0	0	0	0	0	0	0	0
SYNAPSE	XSY	0	0	0	0	1	0	0	2015	2	622			3.68233	4812	1	0	0	0	1	0	0	0	1	0	0	0	0	0	0	1	0	0	0	0	0	0	0	0	0	0	0	0	0	0
SweetStake	SWEET	0	0	0	0	1	0	0	2015	2	680			3.66661	4641	1	0	0	0	1	0	0	0	1	0	0	0	0	0	0	0	0	0	0	0	0	0	0	0	0	0	0	0	0	0
Turron	TUR	0	0	0	0	1	0	0	2015	3	702			3.66332	4606	1	0	0	0	0	1	0	0	1	0	0	0	0	0	0	0	0	0	0	0	0	0	0	0	0	0	0	0	0	0
GoodLuck	GLUCK	0	0	0		1	0	0	2015	5	792			3.5876	3869	1	0	0	0	1	0	0	0	1	0	0	0	0	0	0	0	1	0	0	0	0	0	0	0	0	0	0	0	0	0
BTZ Coin	BTZ	0	0	0	0	1	0	0	2015	1	700			3.56726	3692	1	0	0	0	1	0	0	0	1	0	0	0	0	0	0	0	0	0	0	0	0	0	0	0	0	0	0	0	0	0
BANcoin	BAN	0	0	0	0	1	0	0	2015	3	672			3.55376	3579	1	0	0	0	0	0	0	0	1	0	0	0	0	0	0	0	0	0	0	0	0	0	0	0	0	0	0	0	0	0
Steampunk	PNK	0	0	0	0	1	0	0	2015	2	589			3.54827	3534	1	0	0	0	0	0	0	1	1	0	0	0	0	0	0	0	0	0	0	0	0	0	0	0	0	0	0	0	0	0
ClickCoin	CLICK	0	0	0		1	0	0	2015	2	711			3.53832	3454	1	0	0	0	0	0	0	1	1	0	0	0	0	0	0	0	0	0	0	0	0	0	0	0	0	0	0	0	0	0
PowerStake	POWER	0	0	0		1	0	0	2015	2	706			3.53479	3426	1	0	0	0	1	0	0	0	1	0	0	0	0	0	0	0	0	0	0	0	0	0	0	0	0	0	0	0	0	0
Cycling Coin	CYC	0.475		4.61		1	0	0	2015	0	755			3.52827	3375	1	0	0	0	1	0	0	0	1	0	0	0	0	0	0	0	0	1	0	0	0	0	0	0	0	0	0	0	0	0
SpikePrivateCoin	SPC	0	0	0		1	0	0	2015	1	736			3.46657	2928	1	0	0	0	1	0	0	0	1	0	0	0	0	0	0	0	0	0	0	0	0	0	0	0	0	0	0	0	0	0				1
Specie	SPX	0	0	0		1	0	0	2015	6	766			3.44623	2794	1	0	0	0	1	0	0	0	1	0	0	0	0	0	0	0	0	0	0	0	0	0	0	0	0	0	0	0	0	0
Nebuchadnezzar	NEBU	0	0	0		1	0	0	2015	1	746			3.43981	2753	1	0	0	0	1	0	0	0	1	0	0	0	0	0	0	0	0	0	0	0	0	0	0	0	0	0	0	0	0	0
MAZECoin	MAZE	0	0	0	0	1	0	0	2015	1	669			3.43297	2710	1	0	0	0	1	0	0	0	1	0	0	0	0	0	0	0	0	0	0	0	0	0	0	0	0	0	0	0	0	0				1
SoloCoin	SOLO	0	0	0		1	0	0	2015	2	730			3.42716	2674	1	0	0	0	1	0	0	0	1	0	0	0	0	0	0	0	0	0	0	0	0	0	0	0	0	0	0	0	0	0
MystiCoin	MYSTIC	0	0	0		1	0	0	2015	1	723			3.42684	2672	1	0	0	0	1	0	0	0	1	0	0	0	0	0	0	0	0	0	0	0	0	0	0	0	0	0	0	0	0	0
CoinAid	CAID	0	0	0	0	1	0	0	2015	4	693			3.38021	2400	1	0	0	0	1	0	0	0	1	0	0	0	0	0	0	0	0	0	0	0	0	0	0	0	0	0	0	0	0	0				1
NODEScoin	NODES	0	0	0	0	1	0	0	2015	1	678			3.37603	2377	1	0	0	0	0	0	0	0	1	0	0	0	0	0	0	0	0	0	0	0	0	0	0	0	0	0	0	0	0	0
Vector	VEC2	388.4	16101731	4628.82	26.81	1	0	0	2015	2	701			3.35984	2290	1	0	0	0	1	0	0	0	1	0	0	0	0	0	0	0	0	0	0	0	0	0	0	0	0	0	0	0	0	0				1
OptionCoin	OPTION	0	0	0		1	0	0	2015	4	788			3.35411	2260	1	0	0	0	1	0	0	0	1	0	0	0	0	0	0	0	0	0	0	0	0	0	0	0	0	0	0	0	0	0
PurePOS	PURE	0	0	0		1	0	0	2015	2	710			3.34596	2218	1	0	0	0	1	0	0	0	1	0	0	0	0	0	0	0	0	0	0	0	0	0	0	0	0	0	0	0	0	0
XSSXcoin	XSSX	0	0	0	0	1	0	0	2015	1	687			3.34459	2211	1	0	0	0	1	0	0	0	1	0	0	0	0	0	0	0	0	0	0	0	0	0	0	0	0	0	0	0	0	0
InvisibleCoin	IVZ	14.2857		156.84	0.45	1	0	0	2015	3	662	1	0	3.2413	1743	1	0	0	0	1	0	0	0	1	0	0	0	0	0	0	1	0	0	0	0	0	0	0	0	0	0	0	0	0	0				1
Ethereum	ETH	154.358	21206956555	876.7		0	0	0	2014	60	1048			7.17909	15103980	1	0	1	0	0	0	0	0	1	1	0	0	0	0	0	2	2	2	3	484.67	0	0	3	0.6667	0.3333	1	1	109	0	0	1	0	0	1
Safe Network	MAID	4.4958	153123371	24.07		0	0	0	2014	30	1169	1	0	6.79257	6202602	1	0	0	1	0	0	0	0	0	0	0	1	0	0	0	2	1	1	0	0	0	0	0	0	0	0	0	13	0	0	1	0	0	0
SuperNET	UNITY	0.3286	18201664	2.36		0	0	0	2014	153	1038	0.7	0.1	6.33901	2182775	1	0	0	0	0	0	0	0	1	0	0	0	0	0	0	2	1	0	19	0	0	0	0	0.4211	0.6316	0	0	0	3	0	0	0	0	0
Counterparty	XCP	3.9781	24580974	13.18		0	0	0	2014	31	1278	1	0	6.24404	1754045	1	0	1	0	0	0	0	0	0	0	0	0	0	0	0	2	1	2	6	403	0	0	4	0.6667	0.3333	1	1	2	5	0	1	0	0	0
BitBay	BAY	2.8579	22625616	20.18		0	0	0	2014	4	992	1	0	6.06487	1161090	1	0	0	0	0	0	0	0	1	0	0	0	0	0	0	2	2	0	0	0	0	0	0	0	0	0	0	4	0	0				0
Swarm	SWARM	0.3935	90930.4	0.11		0	0	0	2014	3	1110	1	0	5.90185	797712	1	0	0	0	1	0	0	0	0	0	0	0	0	0	0	0	2	0	9	403.56	0	0	3	0.4444	0.5556	1	1	3	9	5				0
Syscoin	SYS	8.8494	67342037	48.26		0	0	0	2014	28	1083			5.87615	751890	1	0	0	0	0	0	0	0	1	0	0	0	0	0	0	2	1	1	6	304.17	0	0	2	0.3333	0.6667	1	1	5	0	0	1	0	0	0
Muse	MUSE	0.9241	16713936	5.97		0	0	0	2014	177	973	0.2354		5.78596	610890			0	0	0	0	0	1	0	0	0	0	0	0	0	0	0	1	0	0	0	0	0	0	0	0	0	0	0	0				0
Storj (1st)	SJCX	5.8451	500000000	33.67		0	0	0	2014	31	1081	0.6847		5.6351	431622	1	0	0	0	0	0	0	0	0	0	0	0	1	0	0	1	1	1	16	297.88	0	0	1	0.75	0.25	1	1	19	2	1	1	0	0	0
Viacoin (presale)	VIA	6.7967	26018038	31.01		0	0	0	2014	8	1104			5.5616	364420	1	0	1	0	0	0	0	0	1	0	0	0	0	0	0	1	1	0	0	0	0	0	0	0	0	0	0	0	0	0				1
Breakout Chain (1st)	BRK; BRX	2.3434	3305519	18.26		0	0	0	2014	31	986	0.2795	0.2072	5.13583	136718	1	0	0	0	0	1	1	0	1	0	0	0	0	0	0	1	0	0	1	0	0	0	0	1	0	1	1	0	0	0	1	0	0	0
Millionaire Coin	MIL	0	0	0		0	0	0	2014	0	1152	0.195		4.85907	72288	1	0	1	0	0	0	0	0	1	0	0	0	0	0	0	0	0	0	0	0	0	0	0	0	0	0	0	0	0	0
Qora	QORA	2.3668	0	23.97		0	0	0	2014	27	1205	1	0.225	4.81518	65340	1	0	1	0	0	0	0	0	1	0	0	0	0	0	0	2	1	1	0	0	0	0	0	0	0	0	0	0	0	0				0
DarkToken	DT	0	0	0		0	0	0	2014	4	1048			4.61342	41060	1	0	1	0	0	0	0	0	1	0	0	0	0	0	0	0	0	0	0	0	0	0	0	0	0	0	0	0	0	0
NOOCoin	NOO	0	0	0		0	0	0	2014	6	955	0.488		4.61337	41055	1	0	0	0	0	0	0	0	1	0	0	0	0	0	0	0	1	0	0	0	0	0	0	0	0	0	0	0	0	0				1
AliPayCoin	ALI	0	0	0		0	0	0	2014	5	980			4.04778	11163	1	0	0	0	1	0	0	0	0	0	0	0	0	0	0	0	0	0	0	0	0	0	0	0	0	0	0	0	0	0				1
VocalCoin	VOCAL	0	0	0		0	0	0	2014	9	998			3.50474	3197	1	0	0	0	0	0	0	1	1	0	0	0	0	0	0	0	0	1	0	0	0	0	0	0	0	0	0	0	0	0
Foldingcoin	FLDC	1.2302	7894764	9.67	0	0	0	0	2014	30	1009	0.0007		3.01787	1042	1	0	0	0	0	0	0	0	0	0	0	0	1	0	0	1	1	0	3	224.67	0	0	2	0.3333	0.6667	1	1	2	0	0
UCoin	U		0	0	0	0	0	0	2014	11	993			2.69897	500	1	0	0	0	0	0	1	0	1	0	0	0	0	0	0	1	0	0	0	0	0	0	0	0	0	0	0	0	0	0
Mastercoin (Omni)	OMNI	1.4376	17632254	0.11		0	0	0	2013	31	1433	0.9185		5.81027	646062	1	0	1	0	0	0	0	0	0	0	0	1	0	0	0	2	1	2	0	0	0	0	0	0	0	0	0	0	0	0				0
Next	NXT	2837.16	173166657	11296.8		0	0	0	2013	51	1354	1	0	4.1786	15087	1	0	0	0	1	0	0	0	1	0	0	0	0	1	0	2	2	2	2	250	0	0	2	0	1	1	1	5	0	0	1	0	0	0
ziftrCOIN	?													5.94201	875000			0	0	0	0	0	0	0	0	0	0	0	0	0	1	0	0	0	0	0	0	0	0	0	0	0	0	0	0				0
Joberr														4.37012	23449	1	0	1	0	0	0	0	0	1	0	0	0	0	0	0	0	0	0	0	0	0	0	0	0	0	0	0	0	0	0				1
[truncated: 8 more columns]
